# Supplementary material for: Three year survival among patients with aids-related Kaposi sarcoma treated with chemotherapy and combination antiretroviral therapy at Moi teaching and referral hospital, Kenya
Source: Infect Agent Cancer. 2019 Sep 10;14:24. doi: 10.1186/s13027-019-0242-9 (PMC6734447; doi:10.1186/s13027-019-0242-9)
Supplement: Supplementary file 1 — Patient data (XLSX 12 kb) [file 13027_2019_242_MOESM1_ESM.xlsx]

## Sheet: Patient Data
PID	group	INITIAL_CD4	t1	event	dead	resp_6wks	t2	sex_	age_enroll	agecat
GEM01	GEM	124	12	0	0	Response	6	1	25	1
GEM02	GEM	646	144	0	0	Response	138	0	25	1
GEM03	GEM	134	144	0	0	Response	138	0	50	3
GEM04	GEM	13	144	0	0	Response	138	0	54	3
GEM05	BV	398	28	1	1	Response	22	1	40	2
GEM06	BV	237	144	0	0	Response	138	1	29	1
GEM07	BV	374	32	0	0	Response	26	1	41	2
GEM08	BV	111	144	0	0	Response	138	1	52	3
GEM09	GEM	477	54	0	0	Response	48	0	33	1
GEM10	BV	147	144	0	0	Response	138	1	70	3
GEM11	GEM	103	44	0	0	Disease	38	0	32	1
GEM12	BV	225	144	0	0	Response	138	1	46	3
GEM13	GEM	103	144	0	0	Response	138	1	29	1
GEM14	BV	36	144	0	0	Disease	138	1	41	2
GEM15	GEM	236	60	1	1	Response	54	1	30	1
GEM16	BV	75	144	0	0	Response	138	0	37	2
GEM17	GEM	317	24	0	0	Response	18	1	42	2
GEM18	BV	190	144	0	0	Response	138	0	36	2
GEM19	GEM	4	16	1	1	Response	10	0	35	2
GEM20	BV	125	28	0	0	Response	22	1	26	1
GEM21	GEM	313	144	0	0	Response	138	1	30	1
GEM22	BV	12	144	0	0	Disease	138	1	50	3
GEM23	GEM	581	144	0	0	Response	138	0	36	2
GEM24	BV	714	144	0	0	Response	138	0	38	2
GEM25	GEM	284	144	0	0	Response	138	0	35	2
GEM26	BV	4	144	1	1	Response	138	0	30	1
GEM27	GEM	107	144	0	0	Response	138	0	32	1
GEM28	BV	442	144	0	0	Disease	138	1	32	1
GEM29	GEM	247	144	0	0	Disease	138	0	27	1
GEM30	BV	197	144	0	0	Response	138	0	30	1
GEM31	GEM	55	144	0	0	Response	138	0	38	2
GEM32	BV	364	144	0	0	Response	138	1	49	3
GEM33	GEM	494	144	0	0	Response	138	0	40	2
GEM34	BV	563	144	0	0	Response	138	1	37	2
GEM35	GEM	5	16	0	1	Disease	10	1	47	3
GEM36	BV	4	40	1	1	Disease	34	1	32	1
GEM37	GEM	107	144	0	0	Response	138	0	29	1
GEM38	BV	237	144	0	0	Response	138	1	47	3
GEM39	GEM	219	144	0	0	Disease	138	0	31	1
GEM40	BV	249	144	0	0	Disease	138	1	32	1
GEM41	GEM	309	144	0	0	Response	138	1	37	2
GEM42	BV	278	144	0	0	Disease	138	0	31	1
GEM43	GEM	137	24	1	1	Response	18	0	26	1
GEM44	BV	824	144	0	0	Response	138	1	26	1
GEM45	GEM	184	44	0	0	Response	38	0	41	2
GEM46	BV	519	144	0	0	Response	138	0	46	3
GEM47	GEM	641	144	0	0	Response	138	0	31	1
GEM48	BV	627	56	0	0	Response	50	1	38	2
GEM49	BV	473	144	0	0	Response	138	1	26	1
GEM50	GEM	246	16	0	0	Disease	10	1	39	2
GEM51	GEM	353	12	0	0	Response	6	1	32	1
GEM52	BV	550	144	0	0	Response	138	1	40	2
GEM53	GEM	225	144	0	0	Disease	138	1	44	2
GEM54	BV	50	140	1	1	Response	134	0	31	1
GEM55	GEM	168	96	0	0	Response	90	0	32	1
GEM56	BV	559	134	1	1	Response	128	1	31	1
GEM57	GEM	150	144	0	0	Response	138	1	46	3
GEM58	BV	219	144	0	0	Response	138	1	44	2
GEM59	GEM	71	144	0	0	Response	138	1	50	3
GEM60	BV	60	12	0	0	Disease	6	1	32	1
GEM61	GEM	109	144	0	0	Response	138	1	39	2
GEM62	BV	187	144	0	0	Response	138	1	30	1
GEM63	GEM	225	12	0	0	Response	6	0	40	2
GEM64	BV	52	16	0	1	Response	10	0	30	1
GEM 6	GEM	261	144	0	0	Response	138	0	27	1
GEM 6	BV	9	144	0	0	Response	138	0	34	1
GEM 6	GEM	265	24	0	0	Response	18	1	39	2
GEM 6	BV	35	27	1	1	Response	21	1	40	2
GEM 6	GEM	302	12	0	0	Response	6	0	28	1
GEM 7	GEM	363	144	0	0	Response	138	1	54	3
